# Supplementary material for: CRISPR/Cas9-mediated mutagenesis of sweet basil candidate susceptibility gene ObDMR6 enhances downy mildew resistance
Source: PubMed Central journal article supplement (PMC8191900; doi:10.1371/journal.pone.0253245), 2021-06-10

**S1\_raw\_images for Figure 4.** The labeling is the same as Figure 4 and the details are described in the legend of Figure 4.

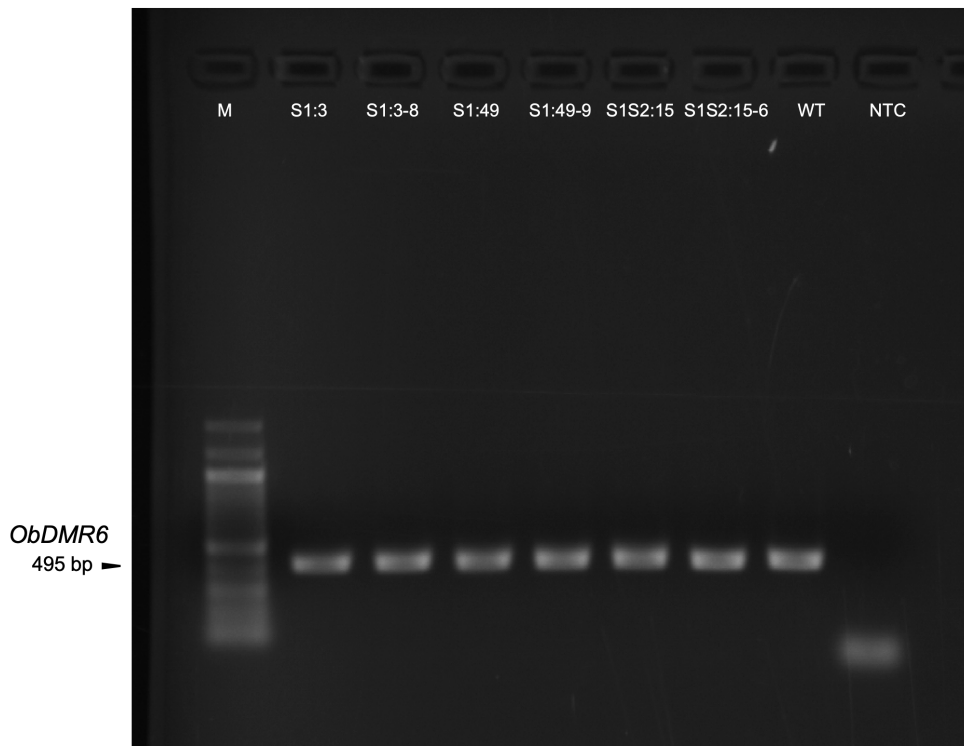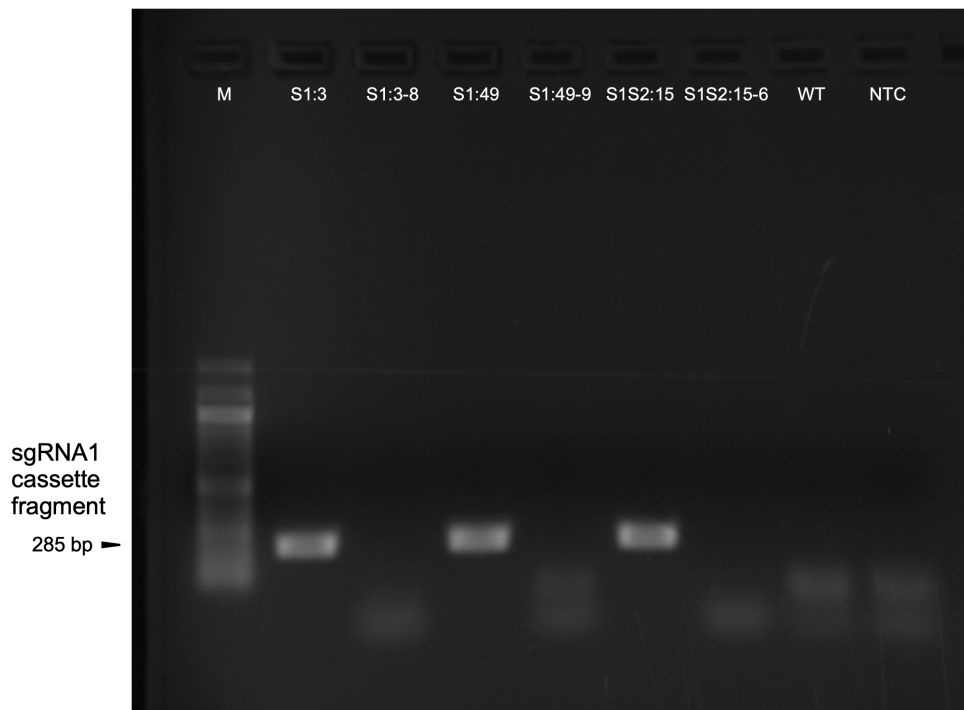

Supplement: pone.0253245.s006.pdf [file pone.0253245.s006.pdf]
